# Supplementary material
Source: PubMed Central journal article supplement (PMC4922852)
Supplement: supp_2015-0282_Supplemental_Information.pdf [file supp_2015-0282_Supplemental_Information.pdf]

Supplementary Figures:

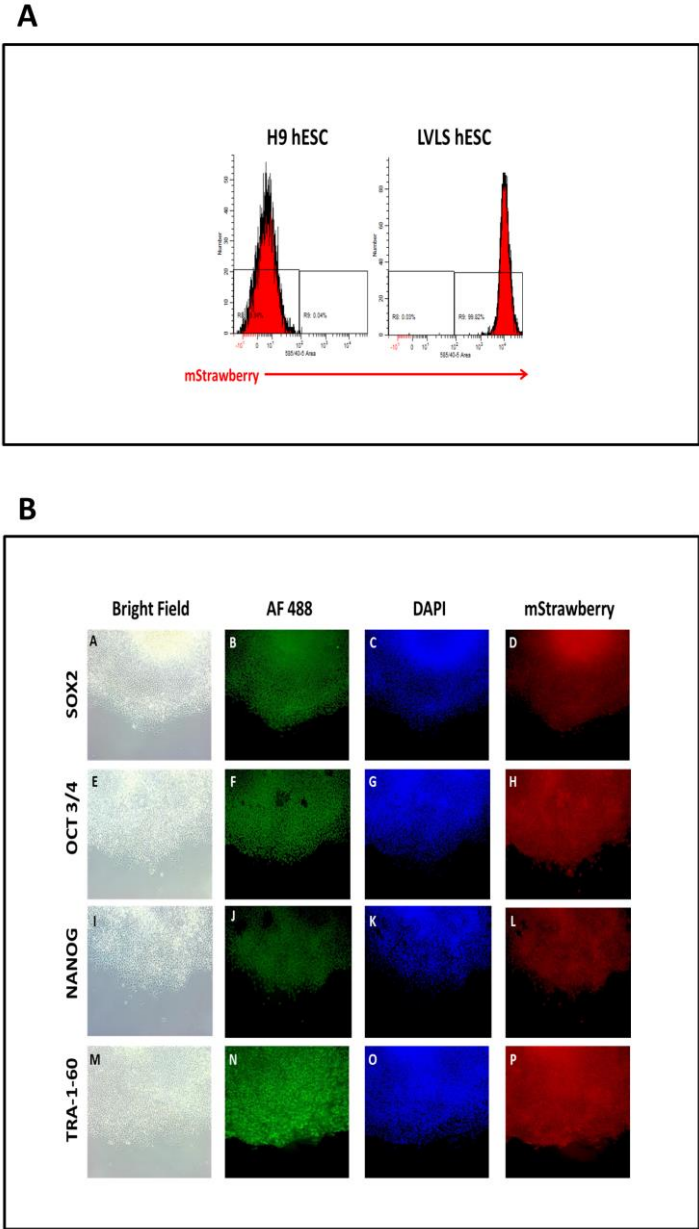

**Fig. S1. Generation of mStrawberry-expressing hESCs.** (A) Flowcytometry of mStrawberry expressing hESCs. (B) Immunocytochemistry of mStrawberry expressing hESCs.

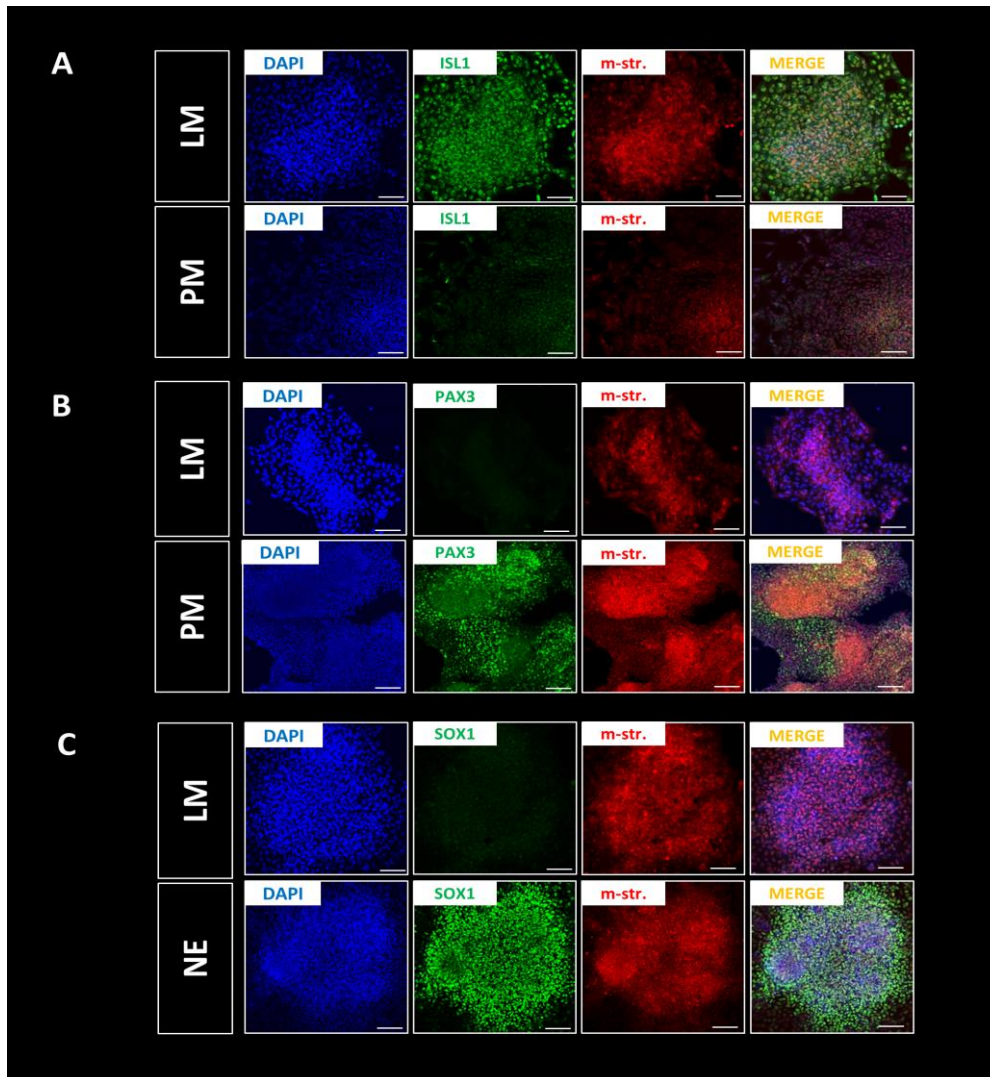

**Fig. S2. Generation of embryonic origin specific SMC populations for a 3D co-culture model. (A-C)** Immunocytochemistry of the LM, PM and NE intermediate lineages derived from an m-Strawberry expressing H9 line (\* $p < 0,05$ , \*\* $p < 0,01$ , \*\*\* $p < 0,001$ ,  $n=3$  independent biological replicates, scale bars 100  $\mu\text{m}$ ).

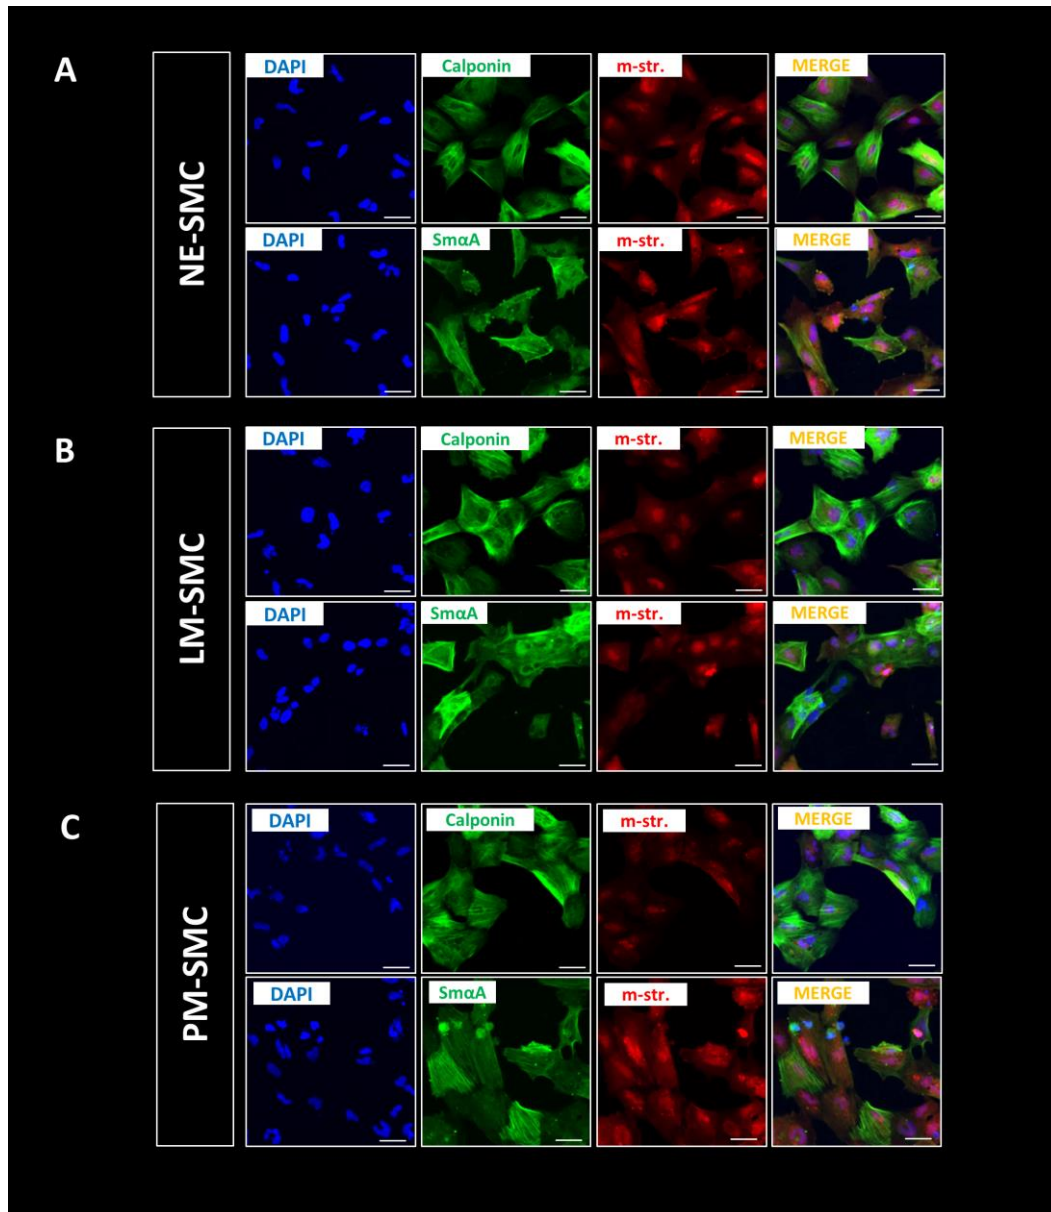

**Fig. S3. Lineage specific SMC derivation.** (A-C) Immunocytochemistry of lineage-specific SMCs of an m-Strawberry expressing H9 line, derived from NE-, LM- and PM-lineage respectively (\* $p < 0,05$ , \*\* $p < 0,01$ , \*\*\* $p < 0,001$ ,  $n = 3$  independent biological replicates, scale bars 50  $\mu\text{m}$ ).

**A**

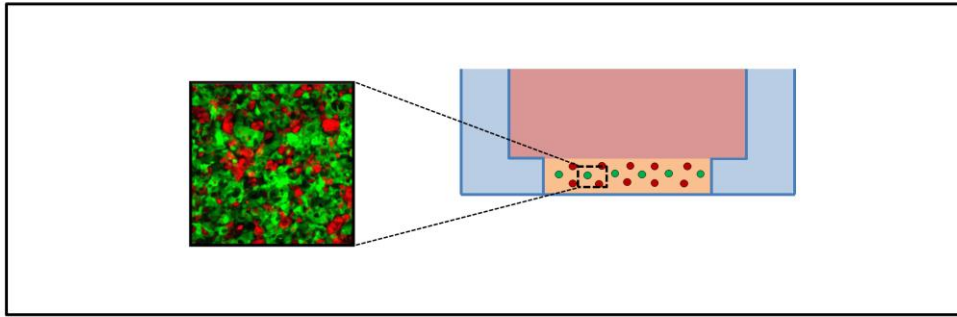

**B**

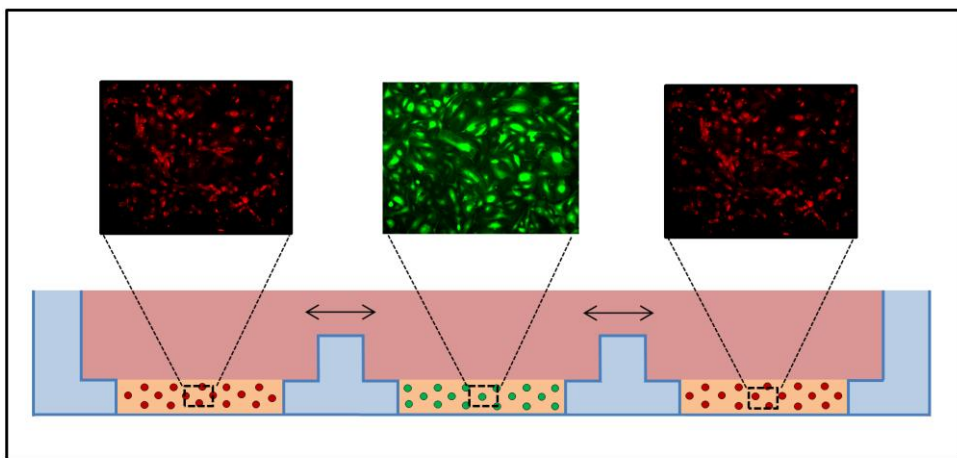

**Fig. S4. Schematic of 3D co-culture and 3D paracrine assay.** (A) Schematic cross section of a 3D co-culture of HUVECS (green) and embryonic origin specific SMCs (red). (B) Schematic representation of a 3D paracrine assay containing HUVECS in the central well and embryonic origin specific SMCs in the surrounding wells, allowing for exchange of the supernatant but not for cell-cell contact.

A

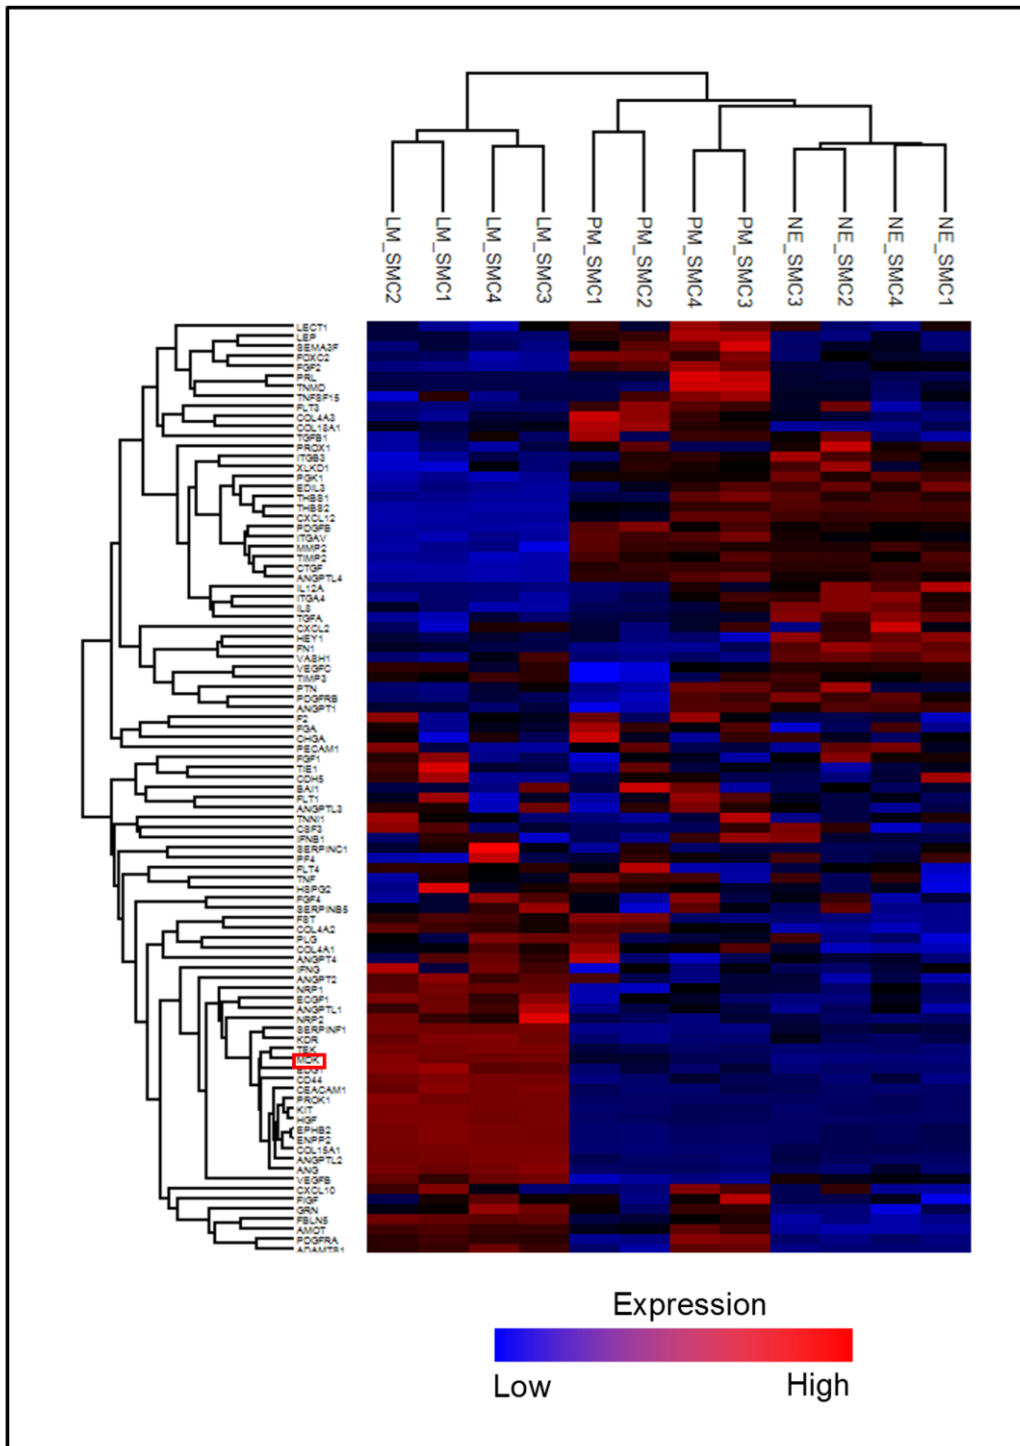

**Fig. S5. Microarray analysis.** (A) Heat map of all angiogenesis genes as expressed by the three embryonic origin specific smooth muscle cells lineages. MDK highlighted in red.

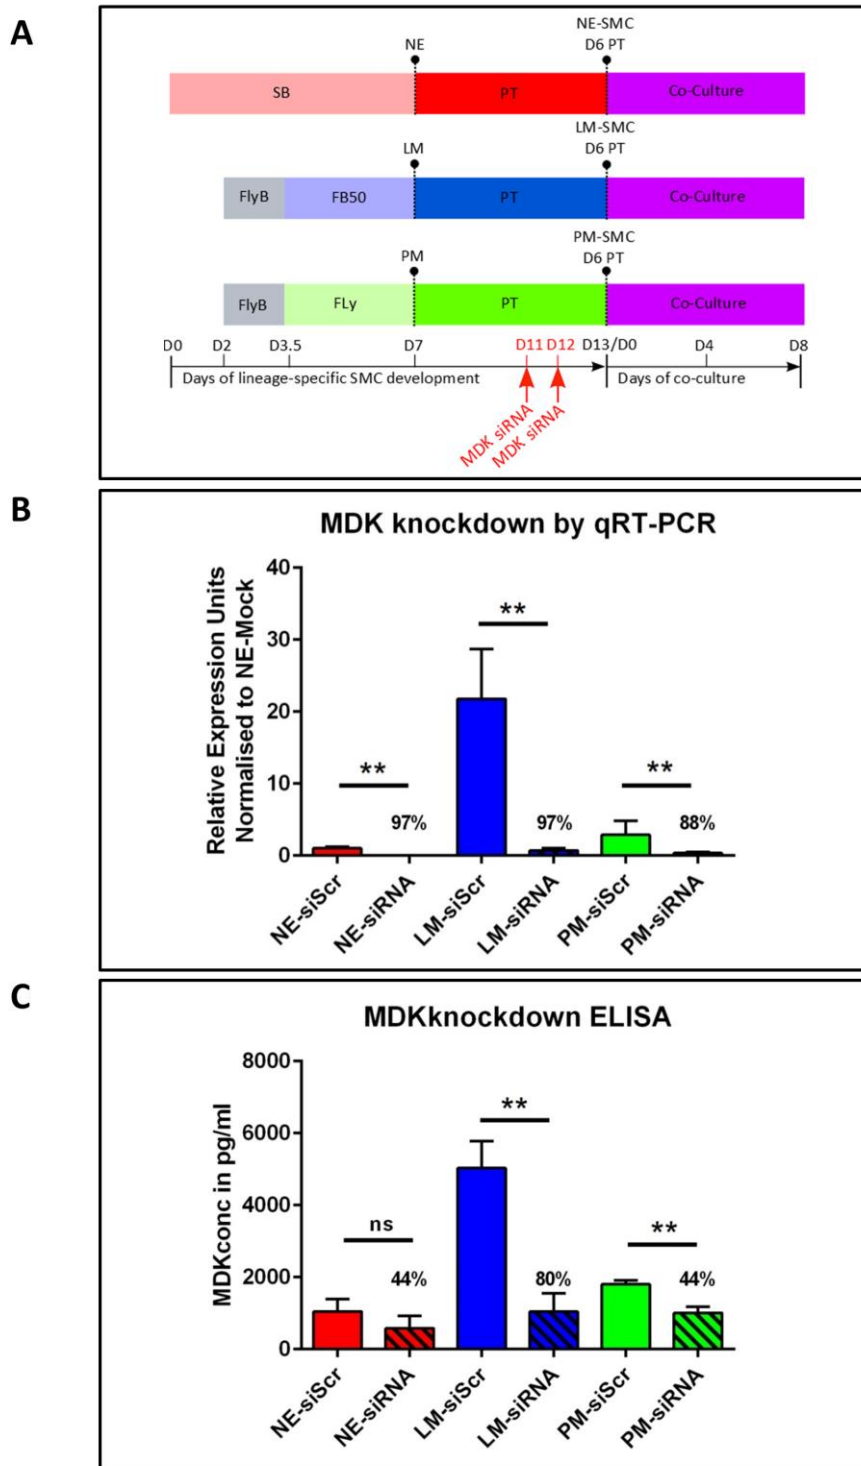

**Fig. S6. Confirmation of siRNA-mediated knockdown of MDK in embryonic origin specific SMCs.** (A) Schematic of SMC differentiation and timing of MDK siRNA intervention. (B) Confirmation of effective knockdown of MDK by qRT-PCR. (C) Confirmation of effective knockdown of MDK by ELISA (\* $p < 0,05$ , \*\* $p < 0,01$ , \*\*\* $p < 0,001$ ,  $n = 3$  independent biological replicates).



## Supplementary tables

### Sanjay Sinha, Table S1

| Gene          | Species | Direction and Sequence              |
|---------------|---------|-------------------------------------|
| <i>GAPDH</i>  | Human   | Forward<br>AACAGCCTCAAGATCATCAGC    |
|               |         | Reverse<br>GGATGATGTTCTGGAGAGCC     |
| <i>PBGD</i>   | Human   | Forward<br>GGAGCCATGTCTGGTAACGG     |
|               |         | Reverse<br>CCACGCGAATCACTCTCATCT    |
| <i>SOX1</i>   | Human   | Forward<br>GGTCAAACGGCCCATGAAC      |
|               |         | Reverse<br>GCTTGCTGATCTCCGAGTTG     |
| <i>GBX2</i>   | Human   | Forward<br>CAGGCTTCGCTCGTCCG        |
|               |         | Reverse<br>GGGTCTTCCTCCTTGTGAGC     |
| <i>PAX6</i>   | Human   | Forward<br>CTTTGCTTGGGAAATCCGAG     |
|               |         | Reverse<br>AGCCAGGTTGCGAAGAACTC     |
| <i>ISL1</i>   | Human   | Forward<br>GCAAATGGCAGCGGAGCCCA     |
|               |         | Reverse<br>AGCAGGTCCGCAAGGTGTGC     |
| <i>NKX2.5</i> | Human   | Forward<br>AGCCGAAAAGAAAGAGCTGTGCG  |
|               |         | Reverse<br>GACCTGCGCCTGCGAGAAGAG    |
| <i>PAX3</i>   | Human   | Forward<br>CGCCTGACGTGGAGAAGAAA     |
|               |         | Reverse<br>TGATGGAACTCACTGACGGC     |
| <i>TCF15</i>  | Human   | Forward<br>GCACCTTCTGCCTCAGCAACCAGC |
|               |         | Reverse<br>GGTCCCCCGGTCCCTACACAA    |
| <i>MEOX1</i>  | Human   | Forward<br>AAAGTGTTCCCTGCATTCTG     |
|               |         | Reverse<br>CACTCCAGGGTTCCACATCT     |
| <i>CNN1</i>   | Human   | Forward<br>GTCCACCCTCCTGGCTTT       |
|               |         | Reverse<br>AAACTTGTTGGTGCCCATCT     |
| <i>ACTA2</i>  | Human   | Forward<br>CACTGTCAGGAATCCTGTGA     |
|               |         | Reverse<br>CAAAGCCGGCCTTACAGA       |
| <i>MDK</i>    | Human   | Forward<br>CCTGCAACTGGAAGAAGGAG     |
|               |         | Reverse<br>CTTCCCTTCCCTTTCTTGG      |



## Sanjay Sinha, Table S2

| <b>Marker</b> | <b>Application</b> | <b>Dilution</b> | <b>Manufacturer (Cat. #)</b>                         |
|---------------|--------------------|-----------------|------------------------------------------------------|
| SOX1          | ICC                | 1:100           | R&D Systems (AF3369)                                 |
| ISL1          | ICC                | 1:200           | Abcam (ab86472)                                      |
| PAX3          | ICC                | 1:50            | Developmental Studies Hybridoma Bank<br>(monoclonal) |
| CNN1          | ICC                | 1:15000         | Sigma (C2687)                                        |
| SM $\alpha$ A | ICC                | 1:400           | Sigma (F3777)                                        |
